# Supplementary material for: Lactiplantibacillus plantarum Induces Apoptosis in Melanoma and Breast Cancer Cells
Source: MDPI journal article supplement (doi:10.3390/microorganisms12010182), 2024-01-17
Supplement: s1 [file s1]

## Supplementary Material

### *Lactiplantibacillus plantarum* induces apoptosis in melanoma and breast cancer cells

Oana Budu<sup>1</sup>, Alexandra Mioc<sup>2,\*</sup>, Codruta Soica<sup>2</sup>, Florina Caruntu<sup>1</sup>, Andreea Milan<sup>2</sup>, Camelia Oprean<sup>2,3</sup>, Daniel Lighezan<sup>1</sup>, Slavita Rotunjanu<sup>2</sup>, Viviana Ivan<sup>1</sup>, Christian Banciu<sup>1</sup>

\* Correspondence: Corresponding Author: [alexandra.mioc@umft.ro](mailto:alexandra.mioc@umft.ro)

#### 1.1. Supplementary Figures

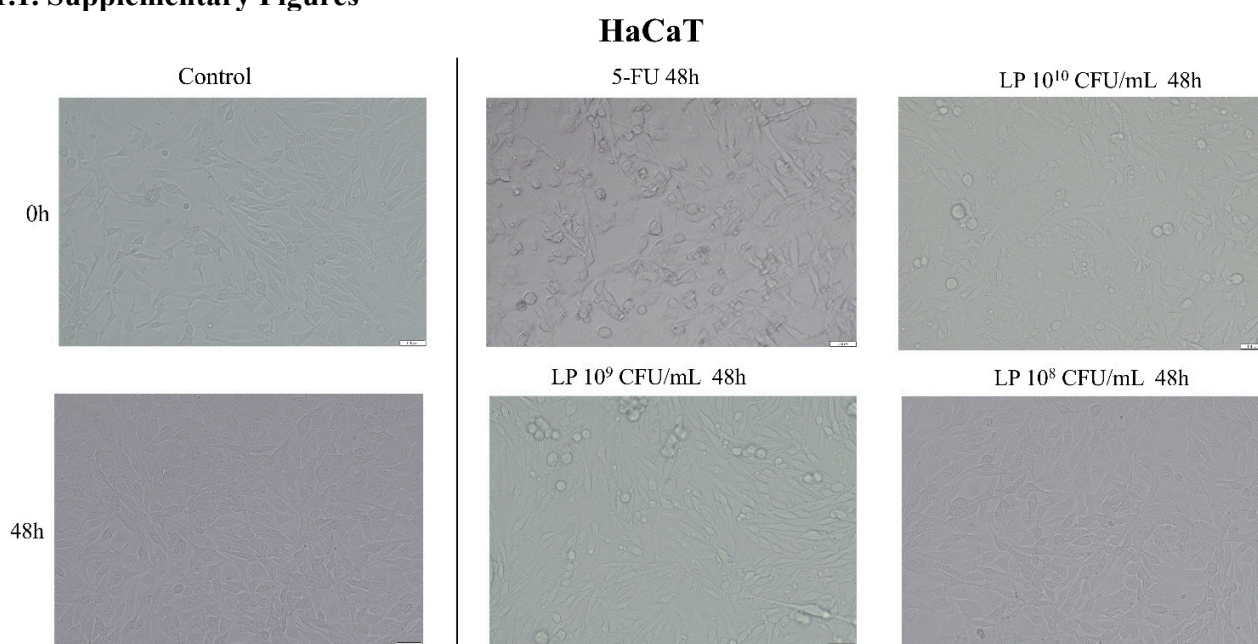

**Supplementary Figure S1.** The evaluation of morphological changes of HaCaT cells after 48 h treatment with 10<sup>8</sup>, 10<sup>9</sup>, 10<sup>10</sup> CFU/ml LP and 10  $\mu$ M 5-FU; the scale bar was 150  $\mu$ m.

### A375

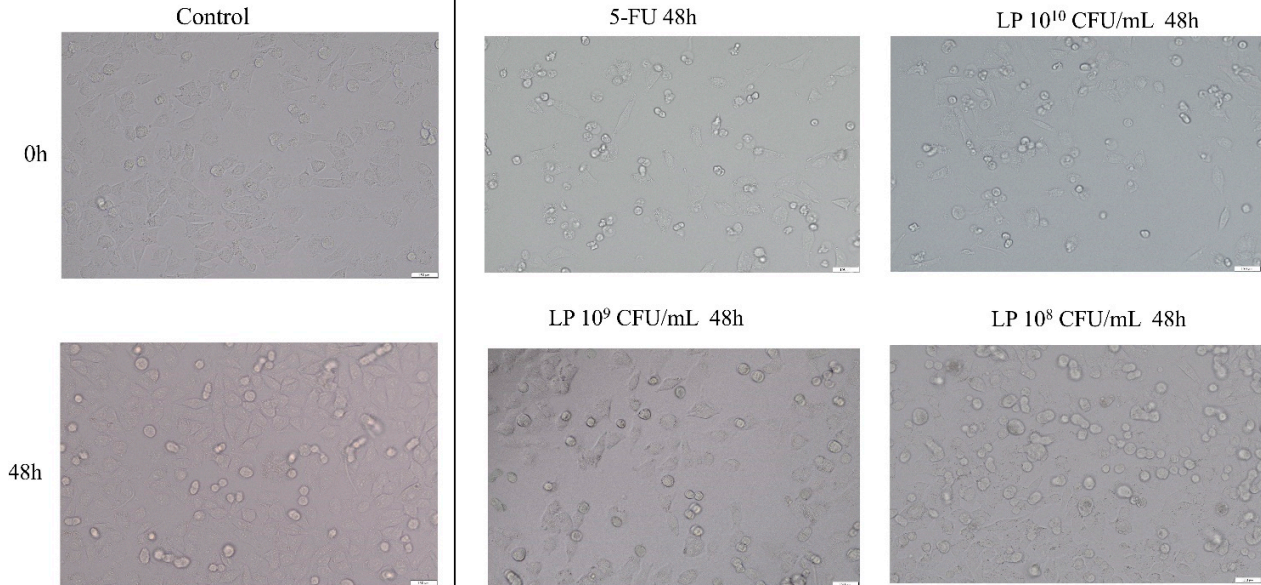

**Supplementary Figure S2.** The evaluation of morphological changes of A375 cells after 48 h treatment with 10<sup>8</sup>, 10<sup>9</sup>, 10<sup>10</sup> CFU/ml LP and 10  $\mu$ M 5-FU; the scale bar was 150  $\mu$ m.

### MCF-7

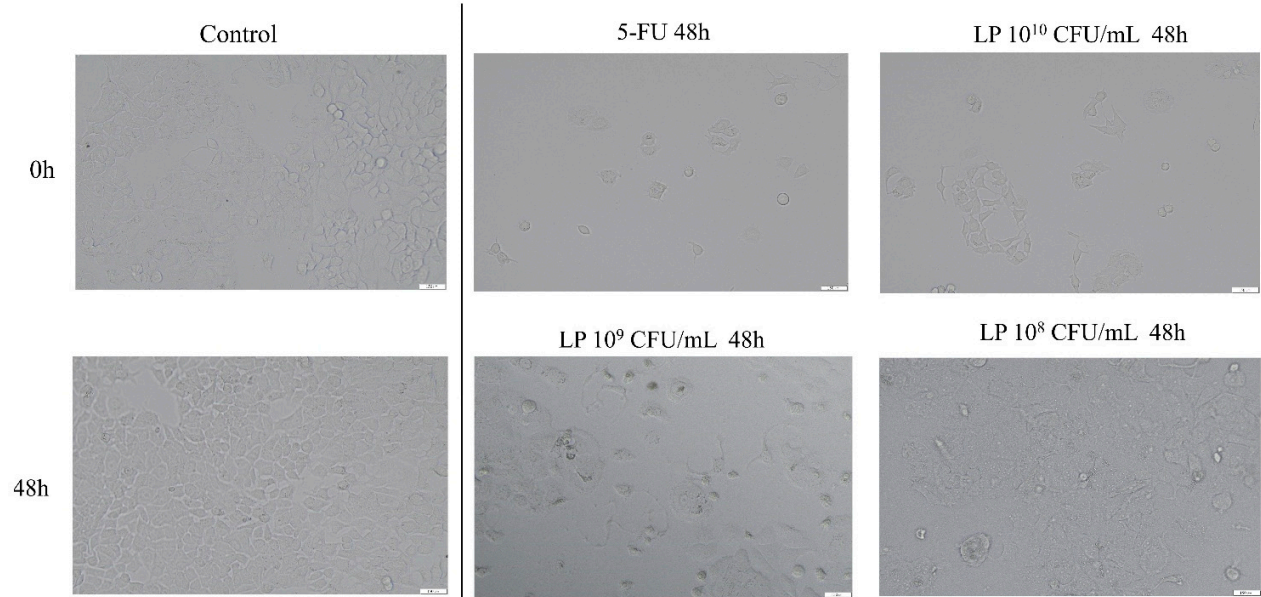

**Supplementary Figure S3.** The evaluation of morphological changes of MCF-7 cells after 48 h treatment with 10<sup>8</sup>, 10<sup>9</sup>, 10<sup>10</sup> CFU/ml LP and 10  $\mu$ M 5-FU; the scale bar was 150  $\mu$ m.
